# Supplementary material for: Neotectonics of interior Alaska and the late Quaternary slip rate along the Denali fault system
Source: Oxford University Press journal article supplement (doi:10.1130/ges01447.1), 2017-08-09
Supplement: ges01447_suppfiles2.xlsx [file ges01447_suppfiles2.xlsx]

## Sheet: Sample information and data
Supplemental File S2 for Haeussler et al.: Cosmogenic 10Be and 9Be data from samples near the Denali Fault system and calculations of age
Site	Running Number	Sample name	Sample type	Sample lithology	Geographic location	LAT	LONG	GPS ELEV (m)	(10Be/9Be)*10-13	Be carrier (mg)	10Be (105 atoms g-1)	Age (e=0, No snow) (ka)	Error (ka)	Average age (ka)
1		DFSC				63º 27.777	148º 38.888							14.1025
	1	DFSC-1	Boulder	Granite	Schist Creek	7038189	06v0418067	919	2.21±0.05	0.296	1.79±0.04	14.87	1.58
	2	DFSC-2	Boulder	Granite	Schist Creek	7038177	06v0418079	926	2.35±0.09	0.317	1.94±0.04	16.04	1.7
	3	DFSC-3	Boulder	Granite	Schist Creek	7038169	06v0418076	927	2.07±0.05	0.33	1.82±0.06	15.01	1.59
	4	DFSC-4	Boulder	Schiste	Schist Creek	7038004	06v0417862	888	1.41±0.04	0.313	1.27±0.03	12.1	1.2
	5	DFSC-5	Boulder	Lithified conglomerate	Schist Creek	7038002	06v0417855	885	1.06±0.04	0.244622	1.01±0.05	9.36	1.06
	6	DFSC-6	Boulder	Granite	Schist Creek	7037969	06v0417703	859	1.91±0.05	0.318	1.58±0.03	15.5	1.6
	7	DFSC-7	Boulder	Granite	Schist Creek	7038031	06v0417844	892	2.04±0.06	0.276	1.88±0.07	15.95	1.7
						63 27.777	148 38.888
	8	DFSC-8	Boulder	Granite	Schist Creek	7037798	06v0417663	886	1.68±0.04	0.312	1.75±0.06	17.5	1.8
						63 27.650	148 39.102
	9	DFSC-9	Boulder	Granite	Schist Creek	7037870	06v0418449	885	0.74±0.03	0.304	0.78±0.04	7.98	0.91
						63 27.699	148 38.193
	10	DFSC-10	Boulder	Granite	Schist Creek	7037928	06v0417663	887	1.34±0.04	0.315	1.45±0.05	14.98	1.64
						63 27.729	148 38.159
	11	DFSC-11	Boulder	Granite	Schist Creek	7038164	06v0417876	884	1.75±0.07	0.246036	1.65±0.07	15.31	1.69
						63 27.849	148 38.855
	12	DFSC-12	Boulder	Granite	Schist Creek	7037816	06v0417677	873	2.06±0.07	0.227654	1.56±0.06	14.63	1.58
						63 27.659	148 38.087
2		DFCR				63º 12.623	144º 49.905							10.98
	13	DFCR-1	Boulder	Pegmatite	Western fork of Chistochina River	7011097	06v0609183	1369	2.77±0.12	0.3	2.04±0.04	11.7	1.24
	14	DFCR-2	Boulder	Pegmatite	Western fork of Chistochina River	7010997	06v0609200	1367	2.45±0.06	0.314	1.82±0.06	10.47	1.11
	15	DFCR-3	Boulder	Schist	Western fork of Chistochina River				2.99±0.08	0.307	2.04±0.07	11.73	1.24
	16	DFCR-4	Boulder	Pegmatite	Western fork of Chistochina River	7010598	06v0608957	1328	2.18±0.06	0.328	1.73±0.03	10.26	1.09
	17	DFCR-5	Boulder	Pegmatite	Western fork of Chistochina River	7010558	06v0608942	1326	2.93±0.07	0.299	1.91±0.06	11.34	1.2
	18	DFCR-6	Boulder	Pegmatite	Western fork of Chistochina River	7010406	06v0608891	1318	2.33±0.06	0.32	1.84±0.06	11.02	1.17
	19	DFCR-7	Boulder	Pegmatite	Western fork of Chistochina River	7010773	06v0609180	1336	2.27±0.06	0.308	1.74±0.03	10.25	1.09
	20	DFCR-8	One large clast	Quartz	Western fork of Chistochina River	7010673	06v0609024	1223	1.51±0.04	0.311	1.73±0.06	11.18	1.18
						63 12.623	144 49.905
	21	DFCR-9	One large clast	Quartz	Western fork of Chistochina River	7010679	06v0609012	1224	1.77±0.04	0.292	1.72±0.06	11.08	1.17
						63 12.626	144 49.919
	22	DFCRSD-1	Amalgamated clasts	Quartz	Western fork of Chistochina River	7011097	06v0609183	1369	2.57±0.07	0.308	1.89±0.06	10.84	1.15
	23	DFCRSD-2	Amalgamated clasts	Quartz	Western fork of Chistochina River	7010773	06v0609180	1336	2.20±0.06	0.315	1.85±0.06	10.91	1.16
3		DFMF				63º 09.246	144º 35.411							12.2029
	24	DFMF-1	Boulder	Granite	Middle fork of Chistochina River	7004851	06v0621381	1173	2.74±0.07	0.296	1.96±0.06	13.16	1.39
	25	DFMF-2	Boulder	Granite	Middle fork of Chistochina River	7004826	06v0621417	1170	2.59±0.06	0.312	1.91±0.06	12.88	1.36
	26	DFMF-3	Boulder	Granite	Middle fork of Chistochina River	7004596	06v0621048	1162	2.16±0.06	0.318	1.84±0.06	12.39	1.3
	27	DFMF-4	Boulder	Granite	Middle fork of Chistochina River	7004603	06v0621116	1153	2.66±0.07	0.294	2.09±0.07	14.18	1.49
	28	DFMF-5	Boulder	Granodiorite	Middle fork of Chistochina River	7004720	06v0621202	1165	2.03±0.06	0.318	1.73±0.06	11.59	1.22
	29	DFMFSD-1	Amalgamated clasts	Quartz	Middle fork of Chistochina River	7004851	06v0621381	1173	1.61±0.05	0.306	1.54±0.05	10.35	1.09
	30	DFMFSD-2	Amalgamated clasts	Quartz	Middle fork of Chistochina River	7004720	06v0621202	1165	1.86±0.05	0.297	1.62±0.06	10.87	1.14
4		DFES				63º 08.794	144º 34.219
	31	DFES-1	Boulder	Gniess	Eastrern fork of Chistochina River	7004238	06v0622430	1129	0	0.299	N/A	Recent	N/A
	32	DFES-2a	Amalgamated clasts	Granite	Eastrern fork of Chistochina River	7004238	06v0622542	1133	0	0.316	N/A	Recent	N/A
	33	DFES-2b	One large clast	Mafic w/quartz vein	Eastrern fork of Chistochina River	7004238	06v0622542	1133	0.11±0.01	0.319	0.13±0.003	0.9	0.1
	34	DFES-3a	4 clasts	Quartz	Eastrern fork of Chistochina River	7004273	06v0622538	1136	0	0.303	N/A	Recent	N/A
5		DFTR				62º 40.515	142º 48.401							14.4857
	35	DFTR6	Amalgamated clasts	Quartz	Tetlin River	6950513	07v0407476	1261	1.97±0.08	0.317	2.08±0.09	15.3	1.7
						62 40.515	142 48.401
	36	DFTR7	One large clast	Quartz	Tetlin River	6950513	07v0407476	1261	2.30±0.06	0.299	2.29±0.07	16.8	1.8
						62 40.515	142 48.401
	37	DFTR8	Amalgamated clasts	Quartz	Tetlin River	6950003	07v0407355	1302	2.50±0.06	0.318	2.65±0.08	18.8	1.69
						62 40.260	142 48.541
	38	DFTR9	One large clast	Quartz	Tetlin River	6950169	07v0407107	1203	1.34±0.04	0.315	1.40±0.05	10.8	1.1
						62 40.328	142 48.821
	39	DFTR10	Amalgamated clasts	Quartz	Tetlin River	6950169	07v0407107	1203	1.31±0.05	0.325	1.65±0.07	12.7	1.4
						62 40.328	142 48.821
	40	DFTR11	Amalgamated clasts	Quartz	Tetlin River	6950570	07v0407225	1201	2.10±0.06	0.285	2.00±0.07	15.4	1.6
						62 40.547	142 48.697
	41	DFTR12	One large clast	Quartz	Tetlin River	6950570	07v0407225	1201	1.14±0.03	0.305	1.51±0.05	11.6	1.2
						62 40.547	142 48.697
6		DFPB				62º 44.984	143º 04.065							27.76
	42	DFPB-1	3 clasts	Quartz	Buck Creek	6959198	07v0394373	1079	2.10±0.08	0.23331	3.52±0.16	27.76	3.06
						62 44.984	143 04.065
7		DFTC				62º 31.996	142º 51.140							18.3667
	43	DFTC4	One large clast	Quartz	Totchinda Creek	6934372	07v0404263	1276	3.13±0.10	0.293	2.46±0.09	17.8	1.9
	44	DFTC6	Amalgamated clasts	Quartz	Totchinda Creek	6934756	07v0404683	1285	3.09±0.08	0.308	2.73±0.09	19.9	1.2
						62 31.996	142 51.140
	45	DFTC7	Amalgamated clasts	Quartz	Totchinda Creek	6934756	07v0404683	1285	3.22±0.07	0.306	2.41±0.07	17.4	1.9
						62 31.996	142 51.140
8		DFWC				63º 29.382	148º 05.064							2.6175
	46	DFWC-1	Boulder	Gniess	Wells Creek alluvial fan	7040410	06v0445993	1030	0.28±0.02	0.301	0.28±0.02	2.1	0.22
						63 29.382	148 05.064
	47	DFWC-2	Boulder	Gniess	Wells Creek alluvial fan	7040322	06v0445954	1010	0.33±0.04	0.28	0.31±0.03	2.38	0.35
						63 29.334	148 05.110
	48	DFWC-3	Boulder	Quartz veins	Wells Creek alluvial fan	7040341	06v0445979	1015	0.43±0.03	0.306	0.33±0.02	2.86	0.34
						63 29.344	148 05.079
	49	DFWC-4	Boulder	Quartz veins	Wells Creek alluvial fan	7040468	06v0446011	1032	0.48±0.04	0.306	0.36±0.03	3.13	0.39
						63 29.412	148 05.045
9		DFNM				62º 37.132	143º 01.905							10.7525
	50	DFNM-1	Amalgamated clasts	Quartz	Noys Mt. rock glacier	6944570	07v0395755	1618	2.63±0.06	0.303	2.13±0.07	10.06	1.06
						62 37.132	143 01.905
	51	DFNM-2	Amalgamated clasts	Quartz	Noys Mt. rock glacier	6944570	07v0395755	1618	2.78±0.11	0.325	2.43±0.11	11.52	1.27
						62 37.132	143 01.905
	52	DFNM-1R	One large clast	Quartz	Noys Mt. rock glacier	6944570	07v0395755	1618	2.97±0.07	0.325	2.57±0.08	12.18	1.28	10.8
						62 37.132	143 01.905
	53	DFNM-RG	Amalgamated clasts	Quartz	Noys Mt. rock glacier	6944570	07v0395755	1618	2.36±0.06	0.31	1.96±0.06	9.25	0.97
10		DFDP				62º 40.457	143º 09.359							11.1733
	54	DFDP-1	Amalgamated clasts	Quartz	David's pit	6950943	07v0389590	1441	2.24±0.08	0.315	1.89±0.08	10.23	1.11
						62 40.457	143 09.359
	55	DFDP-2	One large clast	Quartz	David's pit	6950970	07v0389621	1430	1.77±0.05	0.308	1.46±0.05	7.97	0.84
						62 40.473	143 09.321
	56	DFDP-3	Amalgamated clasts	Quartz	David's pit	6950922	07v0389737	1424	3.04±0.08	0.315	2.56±0.09	14.09	1.49
						62 40.447	143 09.182
	57	DFDP-4	One large clast	Quartz	David's pit	6950943	07v0389590	1441	2.29±0.07	0.296	2.26±0.09	12.27	1.3
						62 40.457	143 09.359
	58	DFDP-5	Amalgamated clasts	Quartz	David's pit	6950943	07v0389590	1441	2.32±0.06	0.308	1.74±0.06	10.98	1.89
						62 40.457	143 09.359
	59	DFDP-6	One large clast	Quartz	David's pit	6950970	07v0389621	1430	2.40±0.06	0.306	1.81±0.06	11.5	1.25
						62 40.473	143 09.321
11		DFNR				63º 30.545	147º 37.924							12.9783
	60	DFNR1	Boulder	Gneiss	Headwaters of Nenana river	7042270	06v0468542	1423	2.29±0.05	0.292	2.42±0.07	15.6	1.64
						63 30.545	147 37.924
	61	DFNR2	Boulder	Gneiss	Headwaters of Nenana river	7042344	06v0468752	1434	1.81±0.05	0.299	2.04±0.07	13.02	1.38
						63 30.585	147 37.675
	62	DFNR3	Boulder	Gneiss	Headwaters of Nenana river	7042276	06v0469108	1429	1.64±0.06	0.296	1.72±0.07	11.05	1.19
						63 30.549	147 37.244
	63	DFNR4	One large clast	Gneiss	Headwaters of Nenana river	7042374	06v0469279	1452	1.44±0.04	0.317	1.53±0.05	9.61	1.02
						63 30.604	147 37.035
	64	DFNR7	Boulder	Gneiss	Headwaters of Nenana river	7042335	06v0468824	1434	2.60±0.09	0.248864	2.33±0.09	13.77	1.49
						63 30.583	147 37.585
	65	DFNR8	Boulder	Gneiss	Headwaters of Nenana river	7042265	06v0468935	1421	2.44±0.08	0.265832	2.48±1.0	14.82	1.6
						63 30.543	147 37.449
12		DFPP				63º 28.207	148º 25.572							14.1967
	66	DFPP-1	One large clast	Quartz	Pyramid Peak	7038567	06v0428926	1123	1.65±0.04	0.297	1.64±0.05	13.42	1.41
						63 28.207	148 25.572
	67	DFPP-2	Boulder	Quartz	Pyramid Peak	7038733	06v0429055	1119	1.84±0.06	0.317	1.94±0.07	15.98	1.71
						63 28.301	148 25.421
	68	DFPPSD	Amalgamated clasts	Quartz	Pyramid Peak	7038733	06v0429055	1119	1.57±0.04	0.306	1.60±0.05	13.19	1.4
						63 28.301	148 25.421
13		DFTH				63º 31.679	147º 03.737							3.154
	69	DFTH-1	Boulder	Gneiss	Headwaters of Susitna River	7044222	06v0496900	1425	0.83±0.06	0.24038	0.53±0.04	3.17	0.39
						63 31.679	147 03.737
	70	DFTH-2	Boulder	Gneiss	Headwaters of Susitna River	7044218	06v0496903	1432	0.96±0.06	0.312494	0.72±0.05	4.27	0.52
						63 31.677	147 03.735
	71	DFTH-3	Boulder	Quartz pegmatite	Headwaters of Susitna River	7044421	06v0496857	1463	0.57±0.04	0.231896	0.35±0.02	1.99	0.24
						63 31.787	147 03.788
	72	DFTH-4	Boulder	Quartz pegmatite	Headwaters of Susitna River	7044368	06v0496871	1455	0.78±0.08	0.299768	0.57±0.06	3.33	0.49
						63 31.758	147 03.775
	73	DFTH-5	Boulder	Gneiss	Headwaters of Susitna River				3.01±0.1	0.24745	1.99±0.07	11.19	1.2
	74	DFTH-6	Boulder	Gneiss	Headwaters of Susitna River				0.60±0.03	0.305424	0.54±0.03	3.01	0.35
14		DFBU				63º 23.909	149º 25.139							11.5083
	75	DFBU-1	One large clast	Quartz pegmatite	Bull Creek	7032071	06v0379163	1113	1.76±0.05	0.312	1.33±0.05	10.9	1.2
						63 23.909	149 25.139
	76	DFBU-2	Boulder	Quartz pegmatite	Bull Creek	7031987	06v0379143	1098	1.90±0.05	0.307	1.52±0.05	12.4	1.3
						63 23.862	149 25.158
	77	DFBU-3	Boulder	Quartz veins	Bull Creek	7031829	06v0379054	1077	1.93±0.05	0.305	1.44±0.05	11.9	1.26
						63 23.777	149 25.253
	78	DFBU-4	One large clast	Quartz	Bull Creek	7031931	06v0379051	1076	1.88±0.05	0.306	1.41±0.05	11.67	1.23
						63 23.777	149 25.261
	79	DFBUSD-1	Amalgamated clasts	Quartz	Bull Creek	7032071	06v0379163	1113	1.82±0.05	0.307	1.38±0.05	11.03	1.17
						63 23.909	149 25.139
	80	DFBUSD-2	Amalgamated clasts	Quartz	Bull Creek	7031931	06v0379051	1076	1.87±0.05	0.309	1.39±0.05	11.15	1.18
						63 23.777	149 25.261
15		DFCA				63º 24.188	149º 20.982							8.95
	81	DFCASD-1	Amalgamated clasts	Quartz	Cantwell Creek	7032459	06v0382642	953	1.31±0.04	0.307	0.99±0.04	9.2	1
						63 24.188	149 20.982
	82	DFCASD-2	Amalgamated clasts	Quartz	Cantwell Creek	7032426	06v0382559	953	1.20±0.04	0.304	0.95±0.04	8.7	0.9
						63 24.168	149 21.079
16		DFNC				62º 14.877	142º 30.177							13.75
	83	DFNC-1	Boulder	Granite	Notch Creek	62 14.877	142 30.177	1683	2.50±0.05	0.293056	2.45±0.07	12	1.3
	84	DFNC-3	Amalgamated clasts	Quartz	Notch Creek	62 14.877	142 30.177	1683	3.09±0.07	0.29402	3.03±0.09	14.9	1.6
	85	DFNC-4	Amalgamated clasts	Quartz	Notch Creek	62 14.920	142 29.995	1669	3.05±0.06	0.290164	2.96±0.08	14.35	1.5
	86	DFNC-5	Boulder	Granite	Notch Creek	62 14.800	142 30.061	1626	1.52±0.04	0.290164	1.47±0.05	7.45	0.8	7.375
	87	DFNC-6	Boulder	Granite	Notch Creek	62 14.810	142 30.010	1623	0.59±0.02	0.295948	1.33±0.06	6.8	0.7
	88	DFNC-7	Boulder	Granite	Notch Creek	62 14.825	142 29.860	1621	1.84±0.05	0.29402	1.81±0.06	9.3	1
	89	DFNC-8	Boulder	Granite	Notch Creek	62 14.825	142 29.789	1620	1.68±0.04	0.2892	1.64±0.05	8.3	0.9
	90	DFNC-9	Boulder	Granite	Notch Creek	62 14.761	142 29.433	1601	1.01±0.03	0.293056	0.99±0.03	5.1	0.5
	91	DFNC-11	Boulder	Granite	Notch Creek	62 14.748	142 29.083	1583	1.78±0.04	0.292092	1.74±0.05	9.04	1
17		DFCM				62º 15.877	142º 31.263							1.2975
	92	DFCM-1	Boulder	Granite	Copper Mountain	62 15.877	142 31.263	1691	0.54±0.02	0.291284	0.45±0.02	2.16	0.23
	93	DFCM-2	Boulder	Granite	Copper Mountain	62 15.828	142 31.296	1702	0.12±0.009	0.26866	0.09±0.007	0.43	0.05
	94	DFCM-3	Boulder	Granite	Copper Mountain	62 15.921	142 31.191	1681	0.36±0.01	0.278558	0.27±0.009	1.33	0.14
	95	DFCM-4	Boulder	Granite	Copper Mountain	62 15.948	142 31.228	1676	0.33±0.01	0.270074	0.26±0.01	1.27	0.14
18		DFRC				62º 47.456	152º 10.927							9.02125
	96	DFRC-1S	Boulder	Granite	Ripsnorter Creek	62 47.456	152 10.927	959	1.03±0.02	0.309666	1.32±0.04	11.34	1.18
	97	DFRC-2S	Boulder	Granite	Ripsnorter Creek	62 47.408	152 11.042	946	1.04±0.02	0.291284	0.81±0.02	7.06	0.73
	98	DFRC-4S	Boulder	Granite	Ripsnorter Creek	62 47.383	152 11.124	934	1.25±0.02	0.27573	0.93±0.03	8.17	0.85
	99	DFRC-5S	Boulder	Granite	Ripsnorter Creek	62 47.383	152 11.193	936	1.02±0.02	0.319564	0.88±0.03	7.74	0.81
	100	DFRC-1N	Boulder	Granite	Ripsnorter Creek	62 47.480	152 10.957	975	1.13±0.02	0.308252	0.94±0.03	7.99	0.83
	101	DFRC-2N	Boulder	Granite	Ripsnorter Creek	62 47.490	152 11.039	1001	1.40±0.03	0.298354	1.13±0.03	9.36	0.97
	102	DFRC-4N	Boulder	Granite	Ripsnorter Creek	62 47.463	152 11.112	982	1.39±0.03	0.292698	1.10±0.03	9.28	0.97
	103	DFRC-5N	Boulder	Granite	Ripsnorter Creek	62 47.420	152 11.161	946	1.71±0.03	0.2828	1.31±0.03	11.23	1.16
19		DFMB				62º 15.994	154º 34.186							14.9575
	104	DFMB-2	Boulder	Granite	Middle Fork of Big River	62 16.011	154 34.060	703	0.38±0.01	0.292698	2.05±0.09	22	2.4
	105	DFMB-5	Boulder	Granite	Middle Fork of Big River	62 15.871	154 33.625	685	0.35±0.01	0.306838	1.02±0.04	10.97	1.18
	106	DFMB-6	Boulder	Granite	Middle Fork of Big River	62 15.711	154 33.277	679	1.11±0.02	0.238966	1.81±0.05	19.86	2.07
	107	DFMBSD-1	Amalgamated clasts	Quartz	Middle Fork of Big River	62 16.034	154 33.979	697	0.81±0.04	0.302	0.66±0.04	7	0.8
		All SC, and CR locations were taken using NAD 83. All other locations were taken using NAD 27 Alaska
		10Be/9Be ratios were normalized to the LLNL KNSTD3110 standard with a value of 2.85x10-12.
		10Be ages were calculated considering a sea-level, high–latitude production rate of 4.68 10Be atoms g-1 yr1 (Nishiizumi et al., 2007).
		Latitude/altitude scaling of the nucleonic production rate was done using Stone (2000).

## Sheet: ages, offsets, slip rates and u
							Arithmetic average and standard deviation				Monte Carlo simulation
Site	Running Number	Sample name	Age (e=0, No snow) (ka)	Error (ka)	Best offset estimate (m)	Error (m)	Average age (ka)	Error (ka)	Slip rate (mm/yr)	Error (mm/yr)	Average age (ka)	Error (ka)	Slip rate (mm/yr)	Error (mm/yr)
1		DFSC			157	10	14.1025	1.52857	11.1328	1.25185	14.105	3.11824	11.1308	2.50588
	1	DFSC-1	14.87	1.58
	2	DFSC-2	16.04	1.7
	3	DFSC-3	15.01	1.59
	4	DFSC-4	12.1	1.2
	5	DFSC-5	9.36	1.06
	6	DFSC-6	15.5	1.6
	7	DFSC-7	15.95	1.7
	8	DFSC-8	17.5	1.8
	9	DFSC-9	7.98	0.91
	10	DFSC-10	14.98	1.64
	11	DFSC-11	15.31	1.69
	12	DFSC-12	14.63	1.58
2		DFCR			144	14	10.98	1.1647	13.1148	1.51511	10.9839	1.26149	13.1101	1.6296
	13	DFCR-1	11.7	1.24
	14	DFCR-2	10.47	1.11
	15	DFCR-3	11.73	1.24
	16	DFCR-4	10.26	1.09
	17	DFCR-5	11.34	1.2
	18	DFCR-6	11.02	1.17
	19	DFCR-7	10.25	1.09
	20	DFCR-8	11.18	1.18
	21	DFCR-9	11.08	1.17
	22	DFCRSD-1	10.84	1.15
	23	DFCRSD-2	10.91	1.16
3		DFMF			154	12	12.2029	1.29106	12.62	1.41182	12.1979	1.79016	12.6251	1.92951
	24	DFMF-1	13.16	1.39
	25	DFMF-2	12.88	1.36
	26	DFMF-3	12.39	1.3
	27	DFMF-4	14.18	1.49
	28	DFMF-5	11.59	1.22
	29	DFMFSD-1	10.35	1.09
	30	DFMFSD-2	10.87	1.14
4		DFES			180	20
	31	DFES-1	Recent	N/A
	32	DFES-2a	Recent	N/A
	33	DFES-2b	0.9	0.1
	34	DFES-3a	Recent	N/A
5		DFTR			115	25	14.4857	1.51922	7.93886	1.20778	14.4777	3.09657	7.94327	2.07434
	35	DFTR6	15.3	1.7
	36	DFTR7	16.8	1.8
	37	DFTR8	18.8	1.69
	38	DFTR9	10.8	1.1
	39	DFTR10	12.7	1.4
	40	DFTR11	15.4	1.6
	41	DFTR12	11.6	1.2
6		DFPB			75	8	27.76	3.06	2.70173	0.328553	27.7629	3.10814	2.70144	0.333171
	42	DFPB-1	27.76	3.06
7		DFTC			149	14	18.3667	1.69902	8.11252	0.822075	18.3791	2.01859	8.10703	0.961972
	43	DFTC4	17.8	1.9
	44	DFTC6	19.9	1.2
	45	DFTC7	17.4	1.9
8		DFWC			25.5	4	2.6175	0.331134	9.74212	1.47217	2.61683	0.522375	9.74462	2.18501
	46	DFWC-1	2.1	0.22
	47	DFWC-2	2.38	0.35
	48	DFWC-3	2.86	0.34
	49	DFWC-4	3.13	0.39
9		DFNM			80	14	10.79	1.16972	7.41427	1.03083	10.7909	1.38184	7.41362	1.1764
	50	DFNM-1	10.06	1.06
	51	DFNM-2	11.52	1.27
	52	DFNM-1R	12.18	1.28	60	15	10.715	1.13563	6	0.6	10.7227	1.8714	5.59563	1.32632
	53	DFNM-RG	9.25	0.97
10		DFDP			64	7	11.1733	1.35292	5.72792	0.762088	11.1784	2.31618	5.72534	1.25479
	54	DFDP-1	10.23	1.11
	55	DFDP-2	7.97	0.84
	56	DFDP-3	14.09	1.49
	57	DFDP-4	12.27	1.3
	58	DFDP-5	10.98	1.89
	59	DFDP-6	11.5	1.25
11		DFNR			100	10	12.9783	1.4042	7.70515	0.910713	12.9862	2.50957	7.70047	1.56511
	60	DFNR1	15.6	1.64
	61	DFNR2	13.02	1.38
	62	DFNR3	11.05	1.19
	63	DFNR4	9.61	1.02
	64	DFNR7	13.77	1.49
	65	DFNR8	14.82	1.6
12		DFPP			57	14	14.1967	1.51352	4.01503	0.670256	14.1923	1.97598	4.01627	0.801467
	66	DFPP-1	13.42	1.41
	67	DFPP-2	15.98	1.71
	68	DFPPSD	13.19	1.4
13		DFTH			14	1	3.154	0.410536	4.43881	0.600419	4.49616	3.12766	3.11377	2.18191
	69	DFTH-1	3.17	0.39
	70	DFTH-2	4.27	0.52
	71	DFTH-3	1.99	0.24
	72	DFTH-4	3.33	0.49
	73	DFTH-5	11.19	1.2
	74	DFTH-6	3.01	0.35
14		DFBU			87	5	11.5083	1.22419	7.55974	0.829129	11.5104	1.32829	7.55837	0.897194
	75	DFBU-1	10.9	1.2
	76	DFBU-2	12.4	1.3
	77	DFBU-3	11.9	1.26
	78	DFBU-4	11.67	1.23
	79	DFBUSD-1	11.03	1.17
	80	DFBUSD-2	11.15	1.18
15		DFCA			109	26	8.95	0.951315	12.1788	1.98745	8.95019	0.987644	12.1785	2.03681
	81	DFCASD-1	9.2	1
	82	DFCASD-2	8.7	0.9
16		DFNC			N/A	N/A	13.75	1.47196	N/A	N/A	13.742	1.92836
	83	DFNC-1	12	1.3
	84	DFNC-3	14.9	1.6
	85	DFNC-4	14.35	1.5
	86	DFNC-5	7.45	0.8	68	5	7.665	0.835663	8.87149	1.01516	7.66847	1.66377	8.86747	1.97185
	87	DFNC-6	6.8	0.7
	88	DFNC-7	9.3	1
	89	DFNC-8	8.3	0.9
	90	DFNC-9	5.1	0.5
	91	DFNC-11	9.04	1
17		DFCM			11	1	1.2975	0.153786	8.47784	1.0749	1.29704	0.630684	8.48083	4.19387
	92	DFCM-1	2.16	0.23
	93	DFCM-2	0.43	0.05
	94	DFCM-3	1.33	0.14
	95	DFCM-4	1.27	0.14
18		DFRC			48	5	9.02125	0.950013	5.32077	0.618056	9.01784	1.76429	5.32278	1.09913
	96	DFRC-1S	11.34	1.18
	97	DFRC-2S	7.06	0.73
	98	DFRC-4S	8.17	0.85
	99	DFRC-5S	7.74	0.81
	100	DFRC-1N	7.99	0.83
	101	DFRC-2N	9.36	0.97
	102	DFRC-4N	9.28	0.97
	103	DFRC-5N	11.23	1.16
19		DFMB			~425		14.9575	1.73762			14.9641	6.43155
	104	DFMB-2	22	2.4
	105	DFMB-5	10.97	1.18
	106	DFMB-6	19.86	2.07
	107	DFMBSD-1	7	0.8
